# Supplementary material
Source: PubMed Central journal article supplement (PMC5510701)
Supplement: Supp_Table3.pdf [file Supp_Table3.pdf]

SUPPLEMENTARY TABLE S3. ADJUSTED PARAMETERS FOR TOOLS COMPARED WITH RAREVAR

| <i>Parameter</i>        | <i>Default value</i> | <i>Customized value</i> | <i>Tool name</i> | <i>Version</i> |
|-------------------------|----------------------|-------------------------|------------------|----------------|
| snp-min-allele-freq     | 0.02                 | 0.005                   | TVC              | 4.4-8          |
| gen-min-alt-allele-freq | 0.035                | 0.0025                  |                  |                |
| MAPQ                    | 4                    | 40                      |                  |                |
| downsample              | 2000                 | 34,223                  |                  |                |
| isSkipDepthFilters      | 0                    | 1                       | Strelka          | 1.0.14         |
| ssnvPrior               | 1.00E-06             | 1.00E-03                |                  |                |
| ssnvNoise               | 5.00E-07             | 5.00E-07                |                  |                |
| min-var-freq            | 0.2                  | 0.005                   | VarScan2         | 2.3.7          |
| tumor-purity            | 1                    | 0.54                    |                  |                |
| min-reads2              | 2                    | 5                       |                  |                |
| sig.level               | 0.05                 | 0.5                     | deepSNV          | 1.16.0         |
| adjust.method           | bonferroni           | BH                      |                  |                |
| min-cov                 | 7                    | 5                       | LoFreq           | 2.1.2          |
| tumor-mtc               | bonf                 | fdr                     |                  |                |
| no-src-qual             | off                  | on                      |                  |                |
